# Supplementary material
Source: PubMed Central journal article supplement (PMC2812918)
Supplement: NIHMS162959-supplement-2_si_002.pdf [file NIHMS162959-supplement-2_si_002.pdf]

**Supporting Information II**  
**for**  
**Peloruside B, a New and Potent Antitumor Macrolide from the New Zealand**  
**Marine Sponge *Mycale hentscheli*: Isolation, Total Synthesis and Bioactivity**

A. Jonathan Singh,<sup>†</sup> Chun-Xiao Xu,<sup>‡</sup> Xiaoming Xu,<sup>‡</sup> Lyndon M. West,<sup>⊥</sup> Anja Wilmes,<sup>†</sup> Ariane Chan,<sup>†</sup> Ernest Hamel,<sup>#</sup> John H. Miller,<sup>†</sup> Peter T. Northcote<sup>\*,†</sup>, and Arun K. Ghosh<sup>\*,‡</sup>

<sup>†</sup>Centre for Biodiscovery, Victoria University of Wellington, Wellington, New Zealand;

<sup>‡</sup>Departments of Chemistry and Medicinal Chemistry, Purdue University, West Lafayette, IN 47907; <sup>#</sup>Toxicology and Pharmacology Branch, Developmental Therapeutics Program, Division of Cancer Treatment and Diagnosis, National Cancer Institute, Frederick, National Institutes of Health, Frederick, MD; <sup>⊥</sup>Department of Chemistry & Biochemistry, Florida Atlantic University, Boca Raton, FL.

**Contents**

|                                                                   |     |
|-------------------------------------------------------------------|-----|
| General experimental for <i>natural</i> peloruside B ( <b>2</b> ) | S28 |
| 1D and 2D NMR spectra of peloruside A ( <b>1</b> )                | S30 |
| 1D and 2D NMR spectra of <i>natural</i> peloruside B ( <b>2</b> ) | S35 |

## Experimental for Natural Peloruside B

**General:** 600 MHz NMR spectra for both natural and synthetic peloruside B (**2**) were obtained using the same spectrometer equipped with a triple resonance HCN cryogenic probe, operating at 600 MHz or 150 MHz for  $^1\text{H}$  and  $^{13}\text{C}$  nuclei respectively. Chemical shifts  $\delta$  (ppm) were referenced to the residual solvent peak ( $\delta_{\text{H}}$  7.26 ppm,  $\delta_{\text{C}}$  77.16 ppm for  $\text{CDCl}_3$ ). Catalytic amounts (1–2  $\mu\text{L}$ ) of  $d_5$ -pyridine were added to each NMR sample performed in  $\text{CDCl}_3$  to prevent compound degradation due to trace acidity associated with the solvent. High-resolution positive-ion mass spectra were recorded on a TOF electrospray mass spectrometer. Normal-phase column chromatography was carried out using 2,3-dihydroxypropoxypropyl-derivatized silica (DIOL). Reversed-phase column chromatography was achieved using HP20 or Amberchrom poly(styrene divinylbenzene) (PSDVB) chromatographic resin. HPLC was performed using a solvent delivery module equipped with 25 mL pump heads. Solvents used for flash normal- and reversed-phase column chromatography were of HPLC or analytical grade quality. All other solvents were purified by glass-distillation. Solvent mixtures are reported as % vol/vol unless otherwise stated. Specimens were stored at  $-20\text{ }^\circ\text{C}$  until required

**Isolation of Natural Peloruside B:** *Mycale hentscheli*, (230 g, NIWA no. MNP 0026), collected at a depth of 23 m from Kapiti Island, New Zealand, was cut into small segments and extracted with MeOH ( $2 \times 700\text{ mL}$ ) for 24 h. The combined extracts were loaded on to HP20 PSDVB beads, washed with  $\text{H}_2\text{O}$  and eluted with i) 20%  $\text{Me}_2\text{CO}/\text{H}_2\text{O}$ , ii) 55%  $\text{Me}_2\text{CO}/\text{H}_2\text{O}$ , iii) 55%  $\text{Me}_2\text{CO}/0.2\text{ M NH}_4\text{OH}$  and iv) 55%  $\text{Me}_2\text{CO}/0.2\text{ M NH}_4\text{OH}$  adjusted to pH 4 with AcOH. Fraction ii) was concentrated to dryness to yield 82.0 mg of a viscous brown oil. The resulting oil was dissolved in MeOH, loaded onto Amberchrom PSDVB and eluted with increasing concentrations of MeOH in  $\text{H}_2\text{O}$  (10–100%). The 48–54% MeOH/ $\text{H}_2\text{O}$  fractions were concentrated to dryness to yield mycalamide D (3 mg). The 56–60% MeOH/ $\text{H}_2\text{O}$  fractions were

concentrated to dryness to yield peloruside A (**1**) (1.1 mg), and concentration of the 68–72% MeOH/H<sub>2</sub>O fractions gave mycalamide A (7.0 mg). The 54–56% MeOH/H<sub>2</sub>O fractions were concentrated to dryness to yield 5.0 mg of brown oil. A portion of this oil (3.0 mg) was recycled twice on DIOL with increasing concentrations of MeCN in CH<sub>2</sub>Cl<sub>2</sub> (1–10%), and 50% MeOH/CH<sub>2</sub>Cl<sub>2</sub>. The 10% MeCN/CH<sub>2</sub>Cl<sub>2</sub> and 50% MeOH/CH<sub>2</sub>Cl<sub>2</sub> fractions were concentrated to dryness to yield a pale yellow oil (1.5 mg). This oil was then purified using HPLC (DIOL, 5  $\mu$ m, 4 mm  $\times$  250 mm), with 20% i-PrOH/n-hexane as the mobile phase, collecting fractions at 1 min intervals to give 13.9  $\mu$ g of mycalamide D, 9.4  $\mu$ g of peloruside A (**1**) and 327  $\mu$ g of peloruside B (**2**).

**Peloruside A (1):** Colorless film; all other data as previously published.

**Peloruside B (2):** Colorless film;  $[\alpha]_D^{25}$  could not be determined accurately because of very small quantity of natural sample and magnitude of rotation was very small; NMR data see Table 1; HRESIMS,  $[M + Na]^+$ , observed m/z 557.29356, calculated 557.29323 for C<sub>26</sub>H<sub>46</sub>O<sub>11</sub>Na,  $\Delta = 0.58$  ppm.

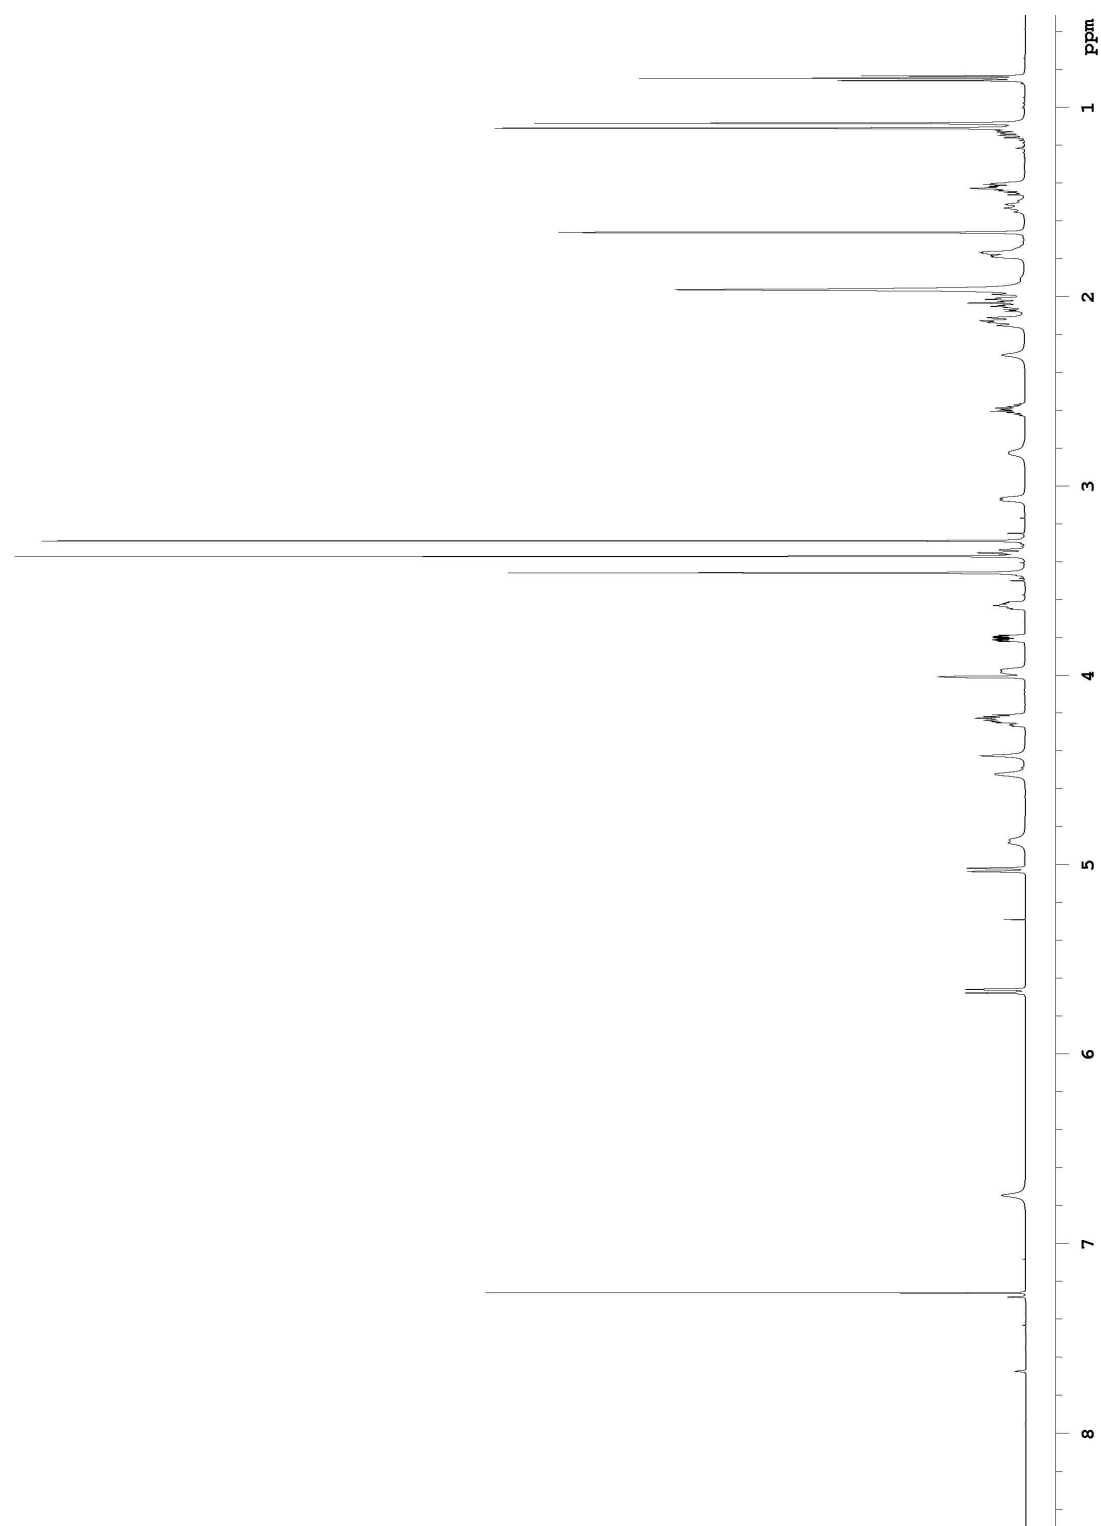

$^1\text{H}$  NMR spectrum of peloruside A (**1**) in  $\text{CDCl}_3$  (600 MHz).

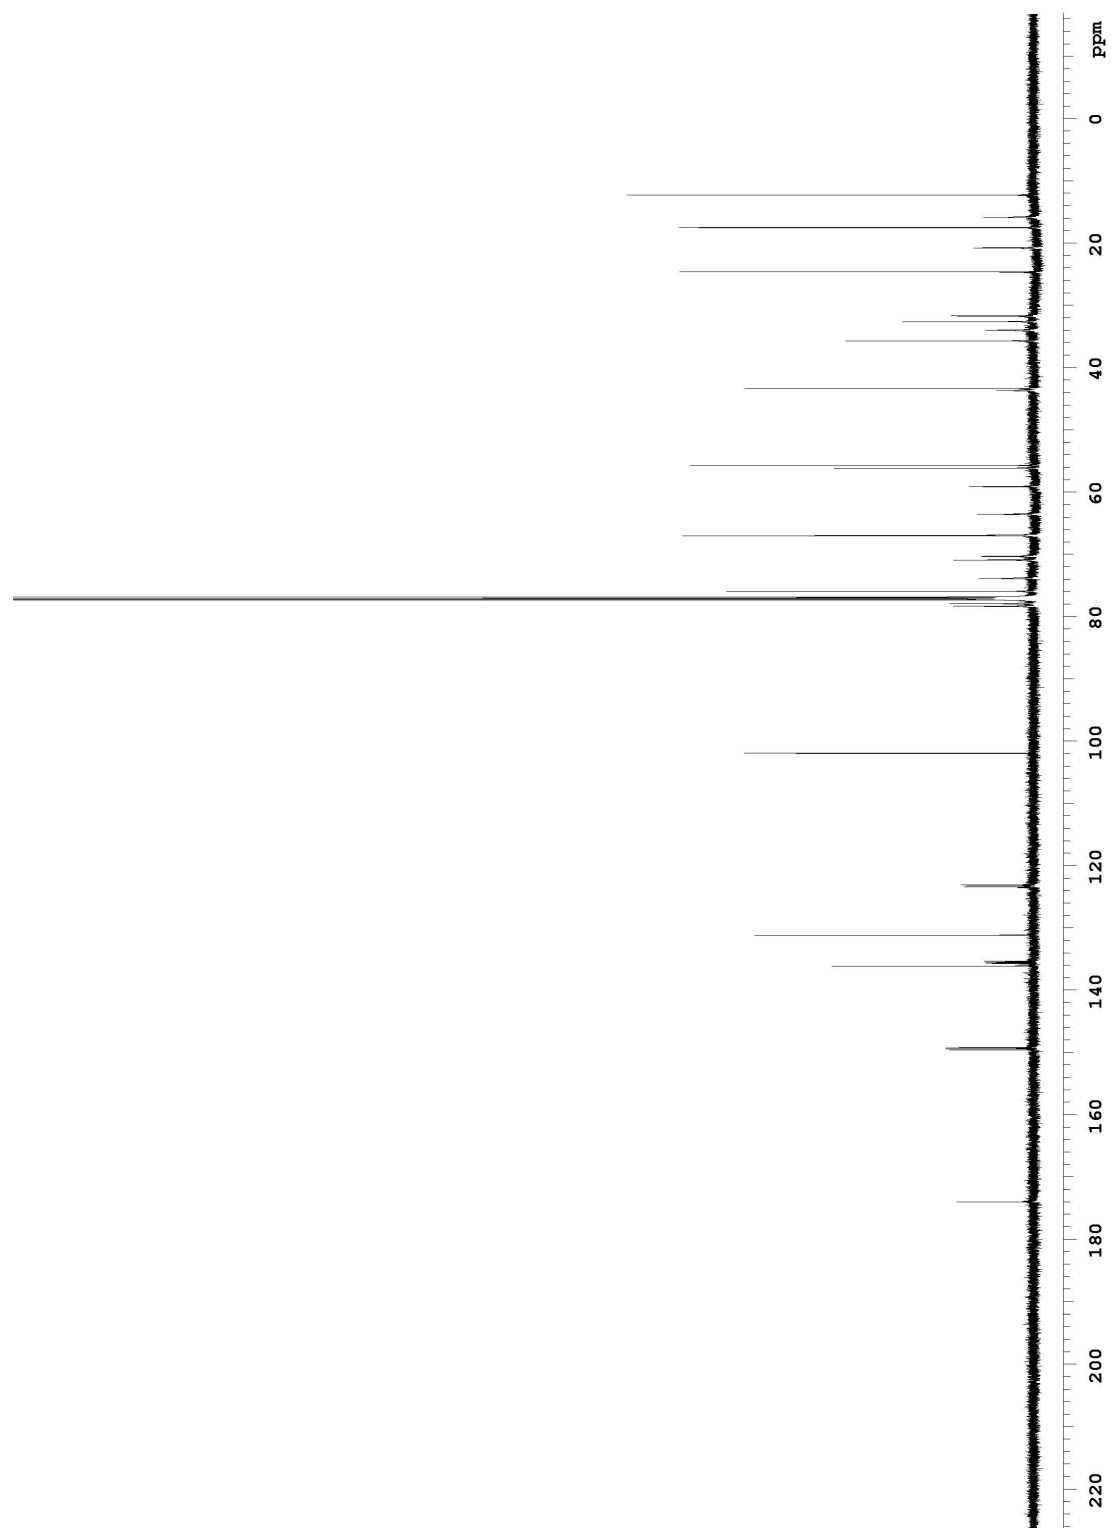

$^{13}\text{C}$  NMR spectrum of peloruside A (**1**) in  $\text{CDCl}_3$  (600 MHz).



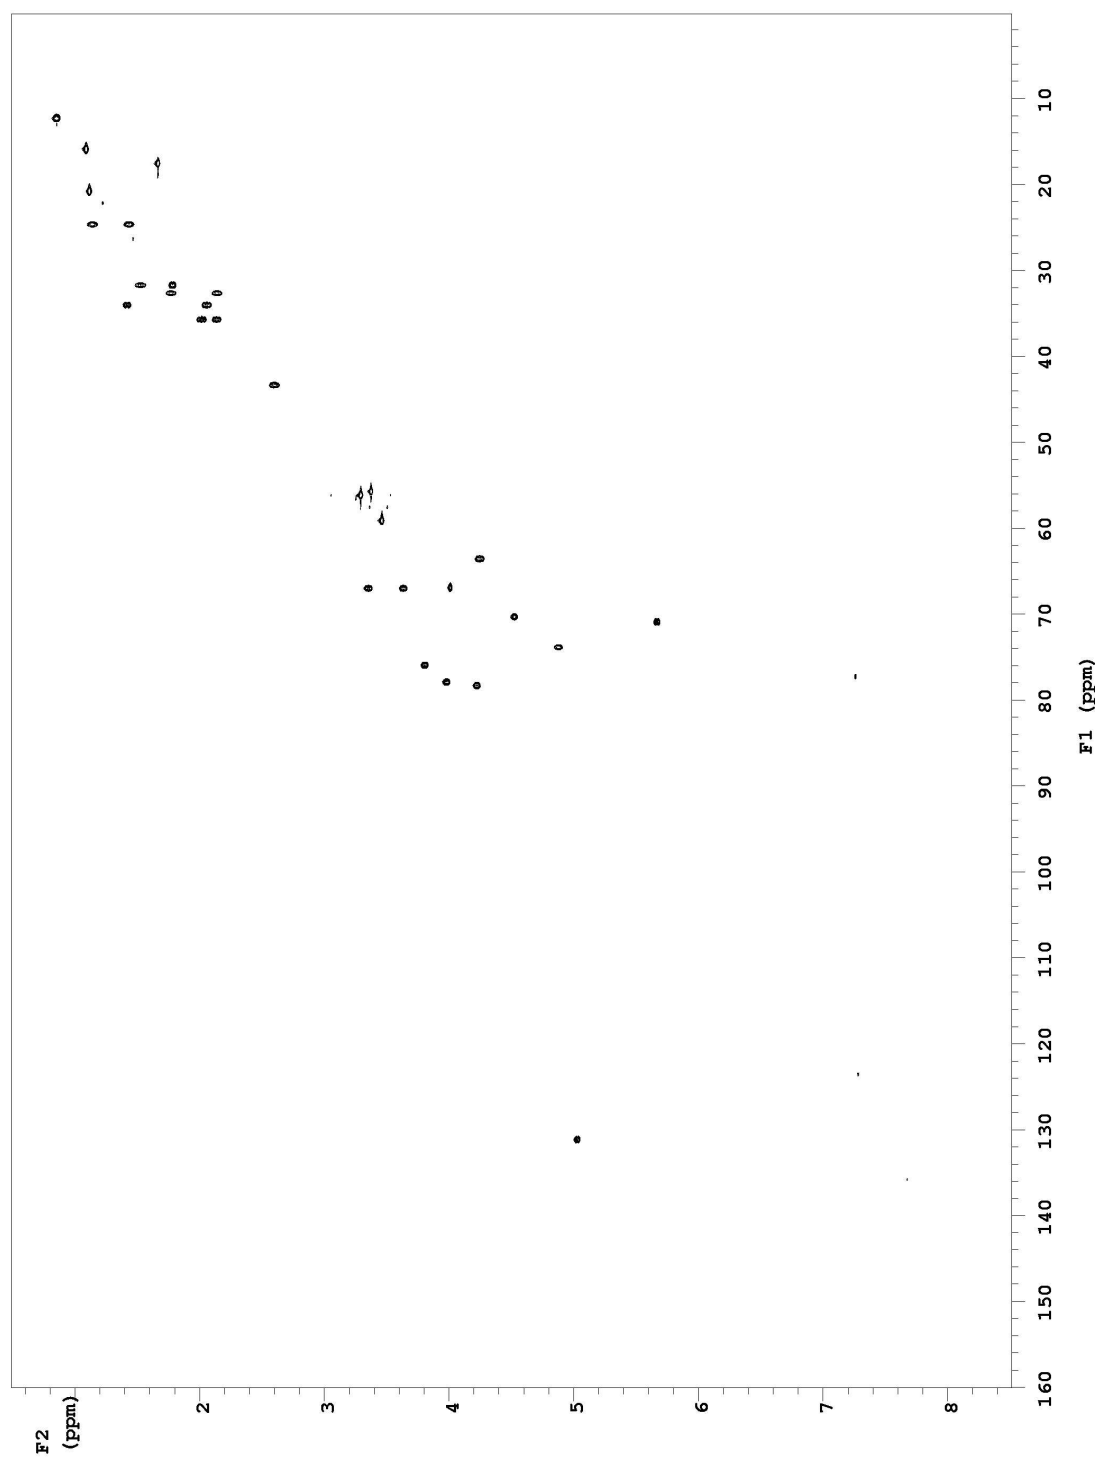

HSQC<sub>ad</sub> NMR spectrum of peloruside A (**1**) in CDCl<sub>3</sub> (600 MHz).

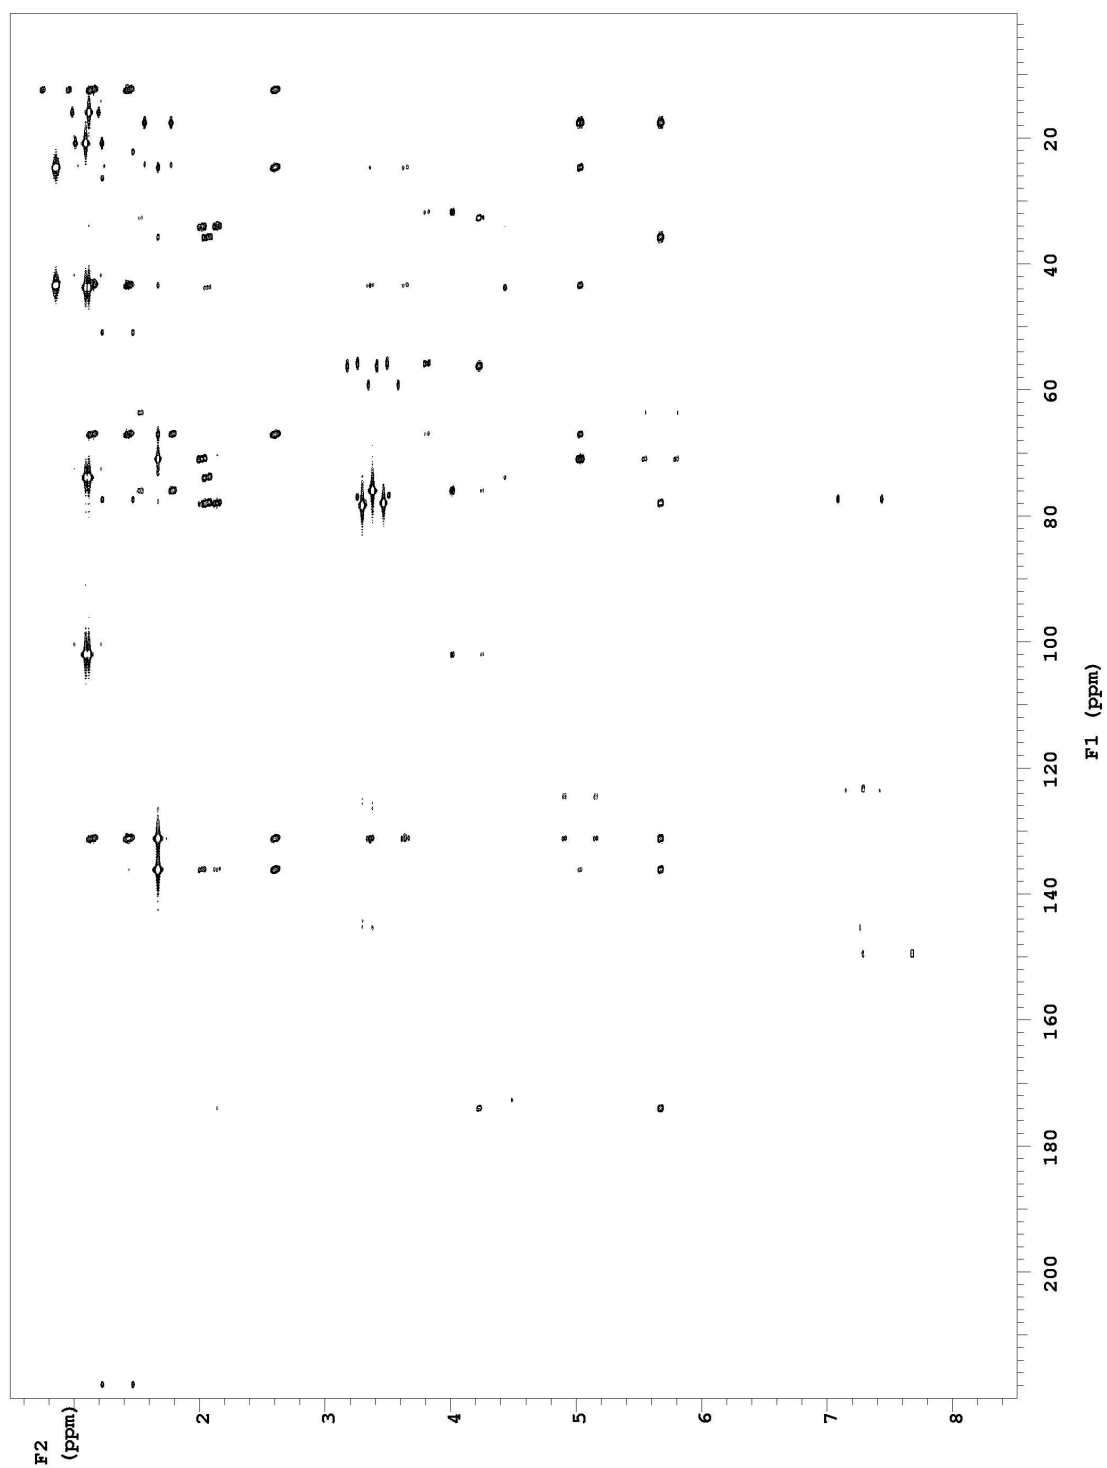

HMBC NMR spectrum of peloruside A (**1**) in  $\text{CDCl}_3$  (600 MHz).

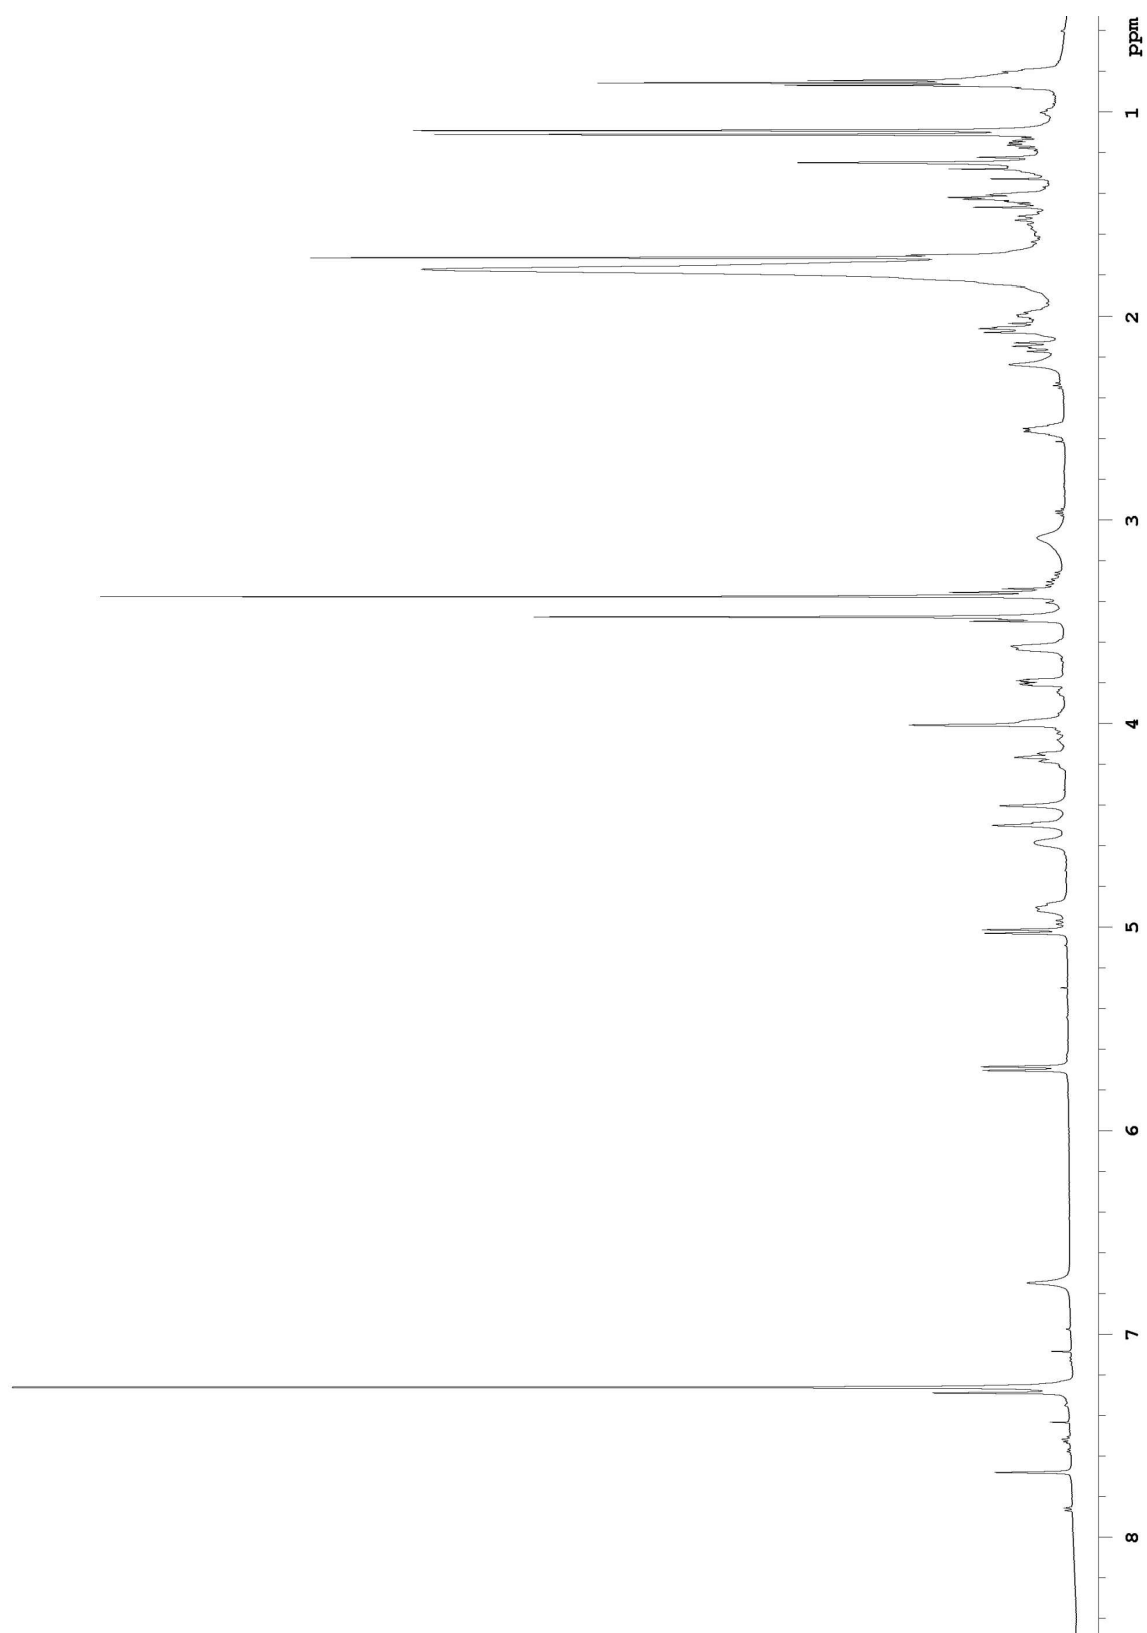

$^1\text{H}$  NMR spectrum of *natural* peloruside B (**2**) in  $\text{CDCl}_3$  (600 MHz).

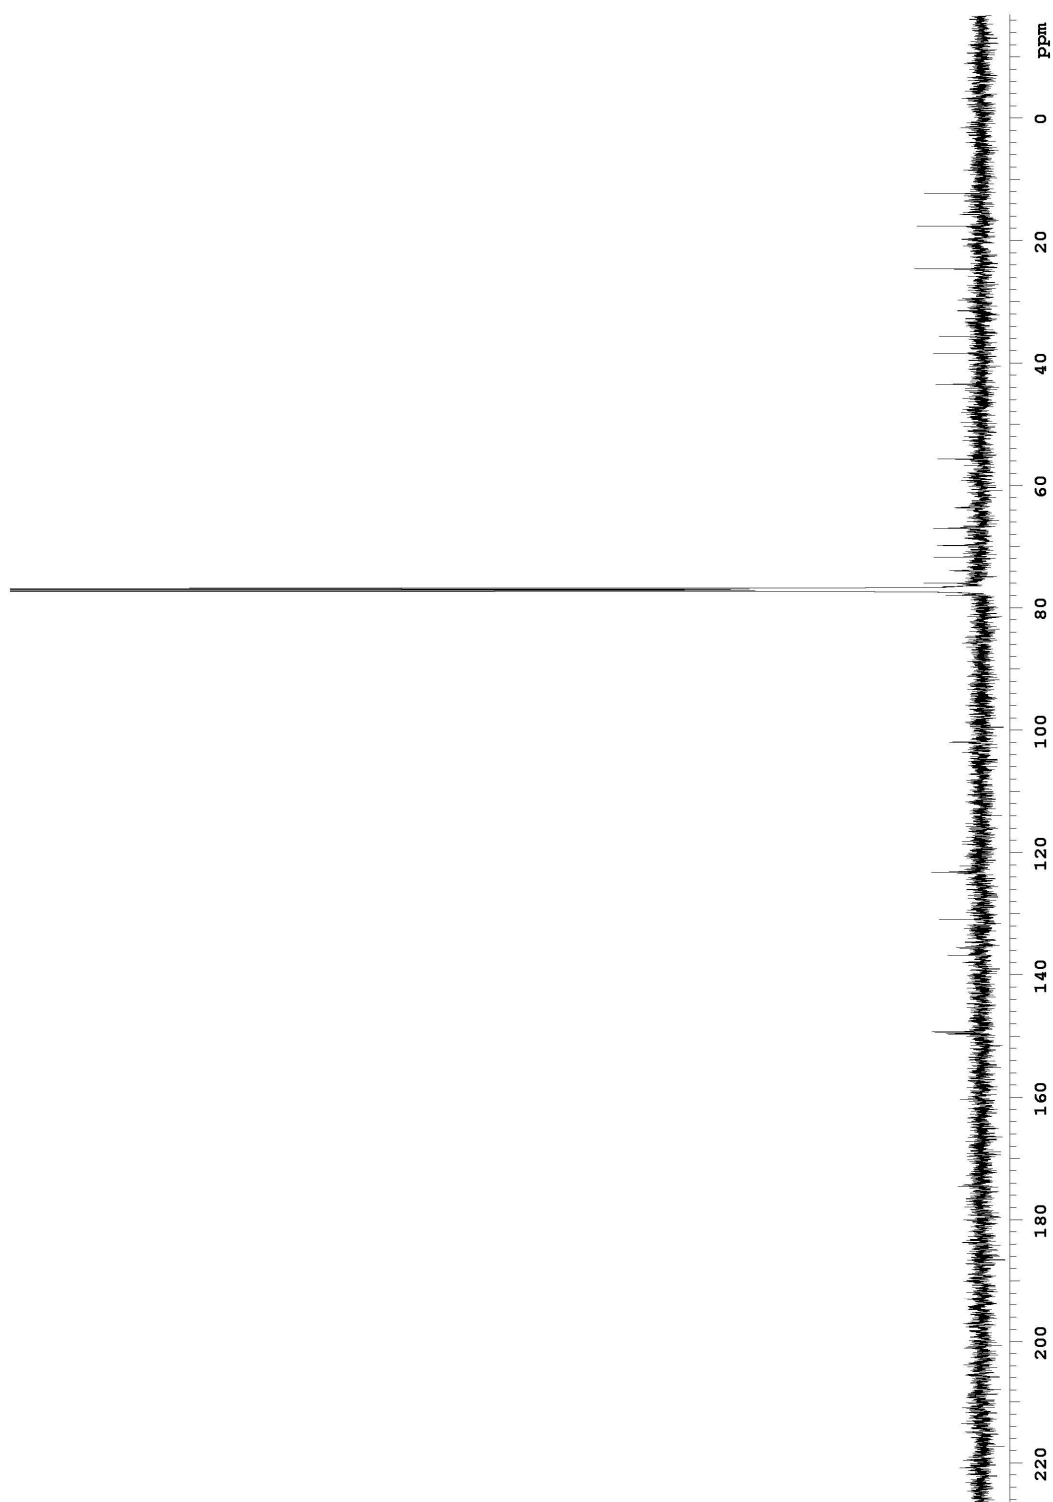

$^{13}\text{C}$  NMR spectrum of *natural* peloruside B (**2**) in  $\text{CDCl}_3$  (150 MHz).

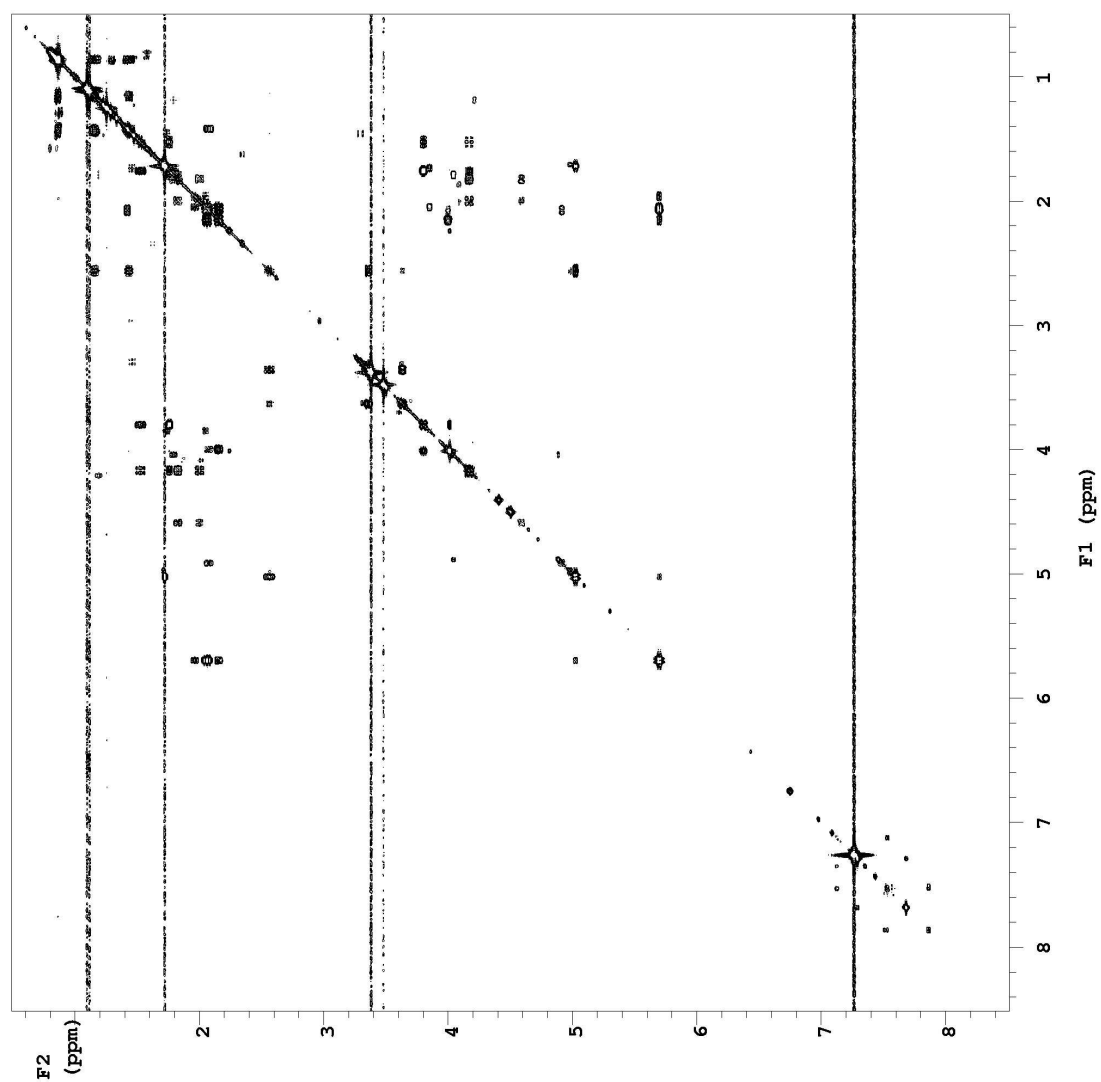

COSY NMR spectrum of *natural* peloruside B (**2**) in  $\text{CDCl}_3$  (600 MHz).

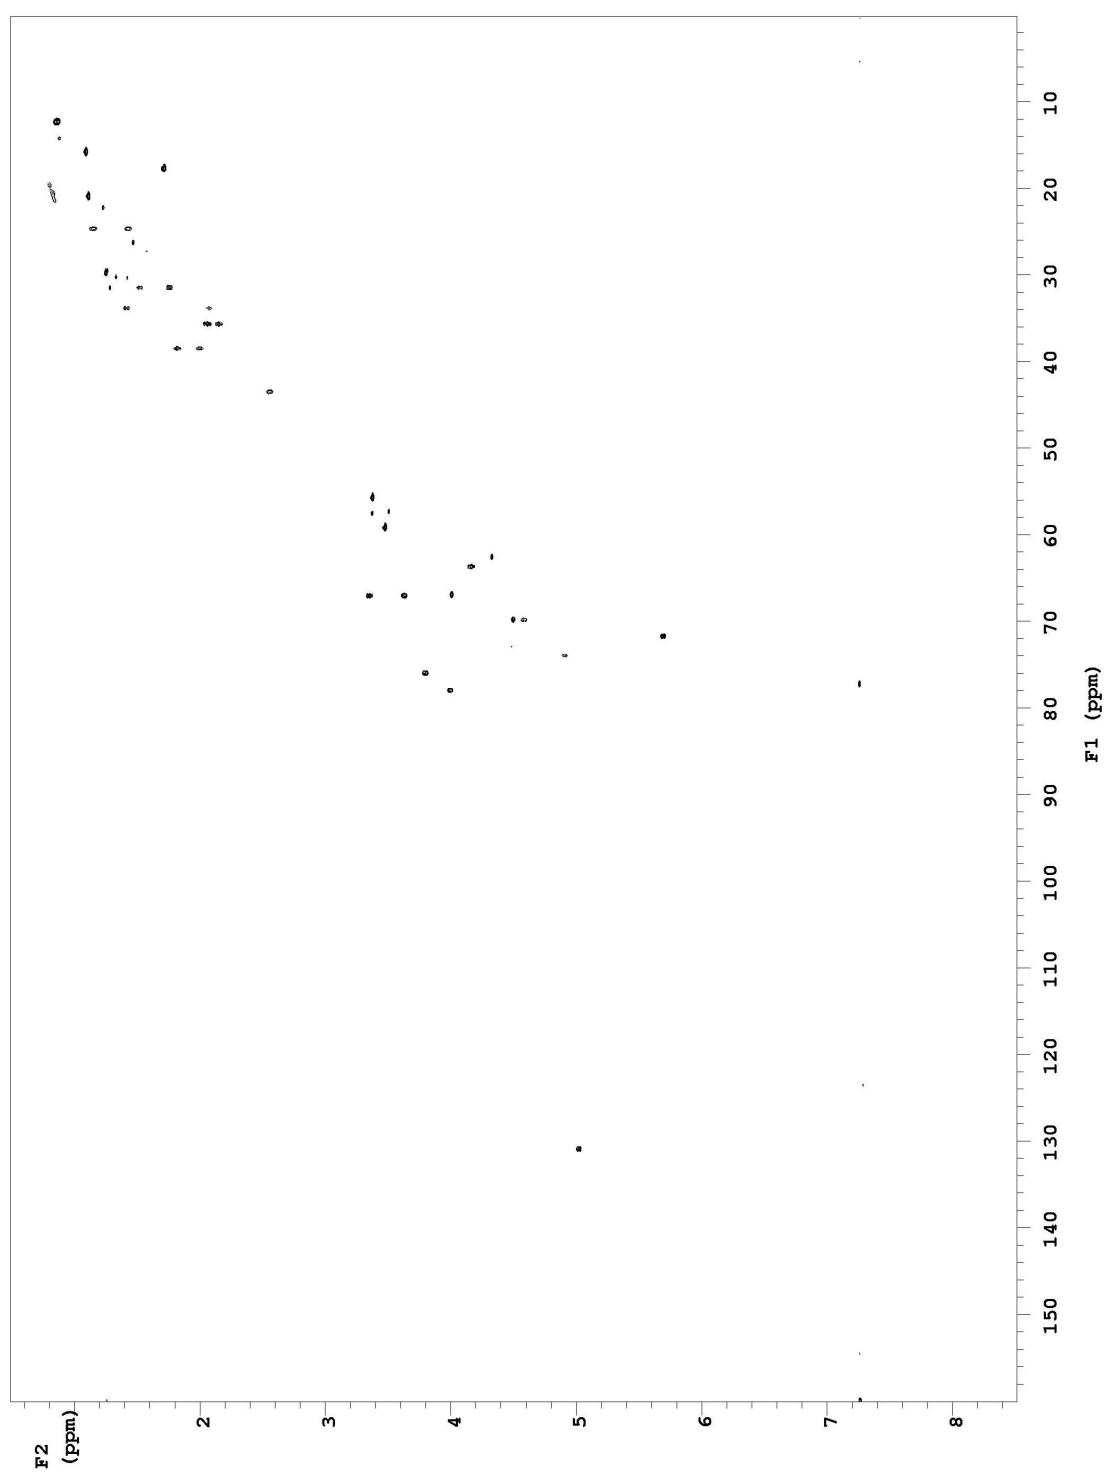

HSQC<sub>ad</sub> NMR spectrum of *natural* peloruside B (**2**) in CDCl<sub>3</sub> (600 MHz).

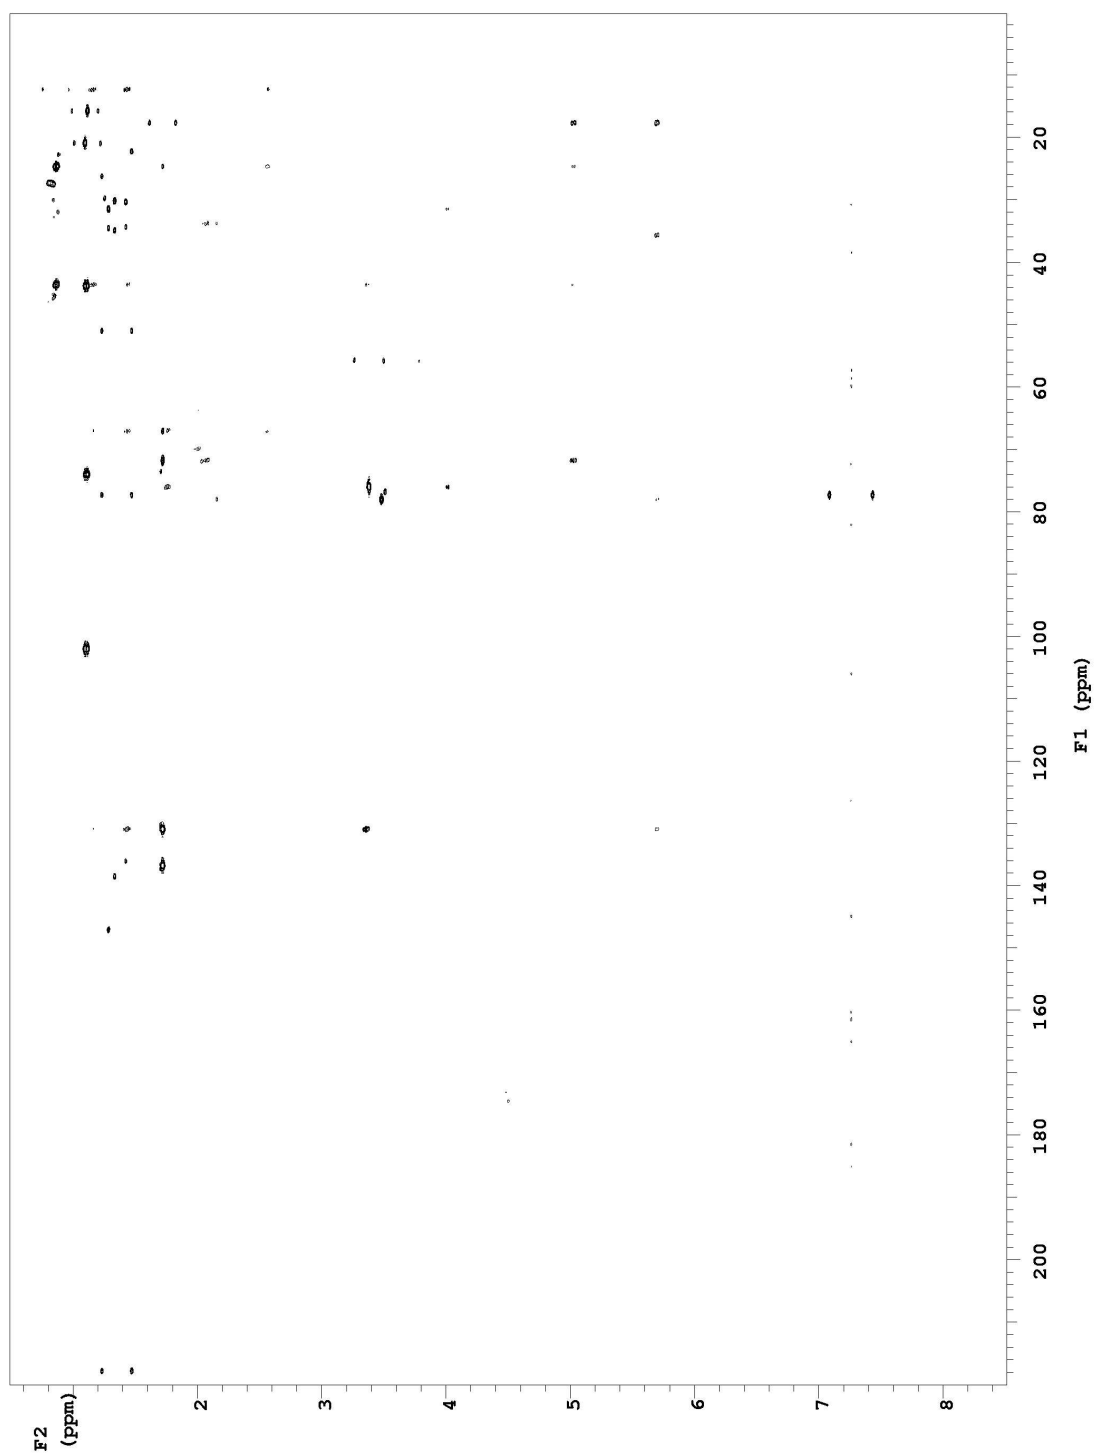

HMBC NMR spectrum of *natural* peloruside B (**2**) in CDCl<sub>3</sub> (600 MHz).

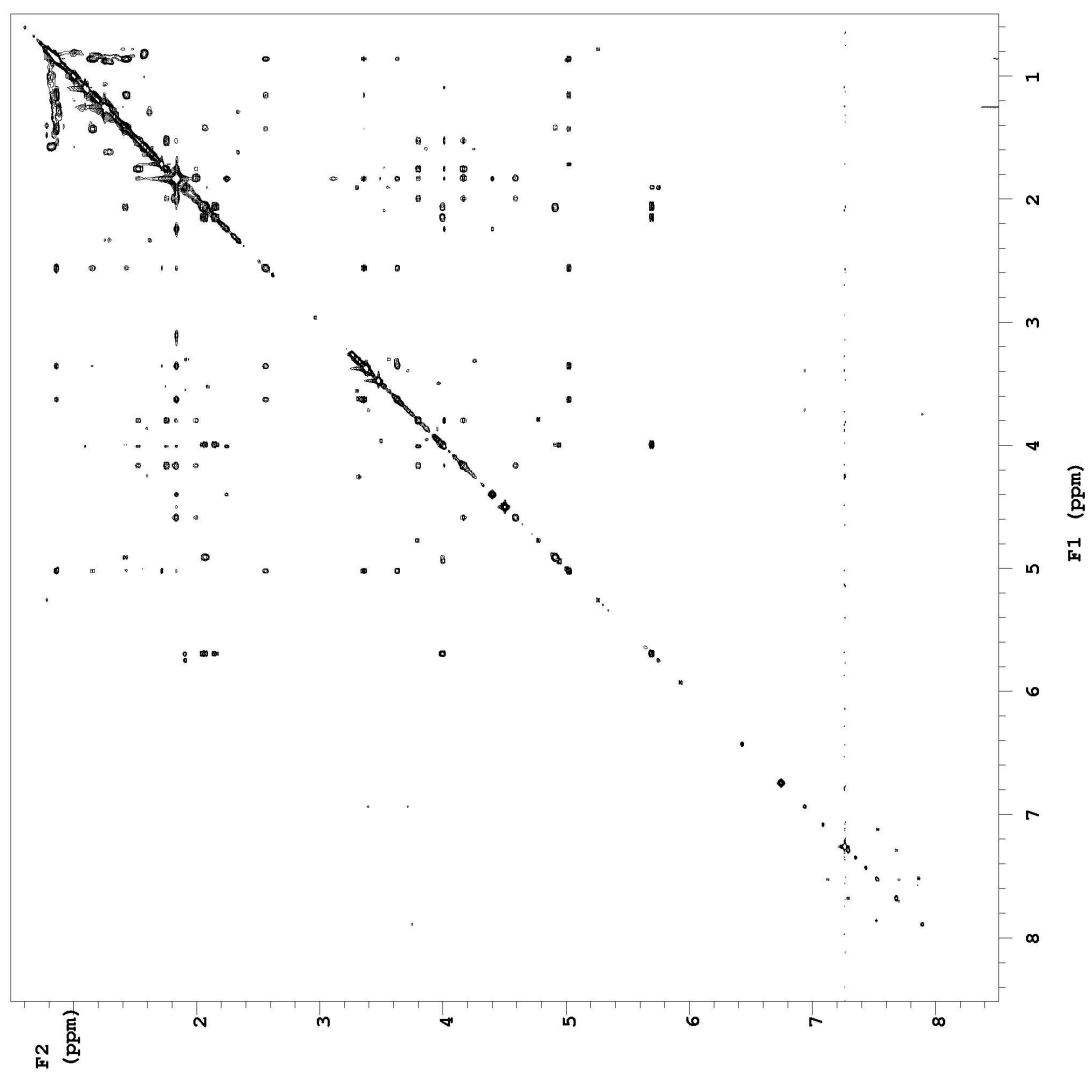

2D TOCSY NMR spectrum of *natural* peloruside B (**2**) in CDCl<sub>3</sub> (600 MHz).

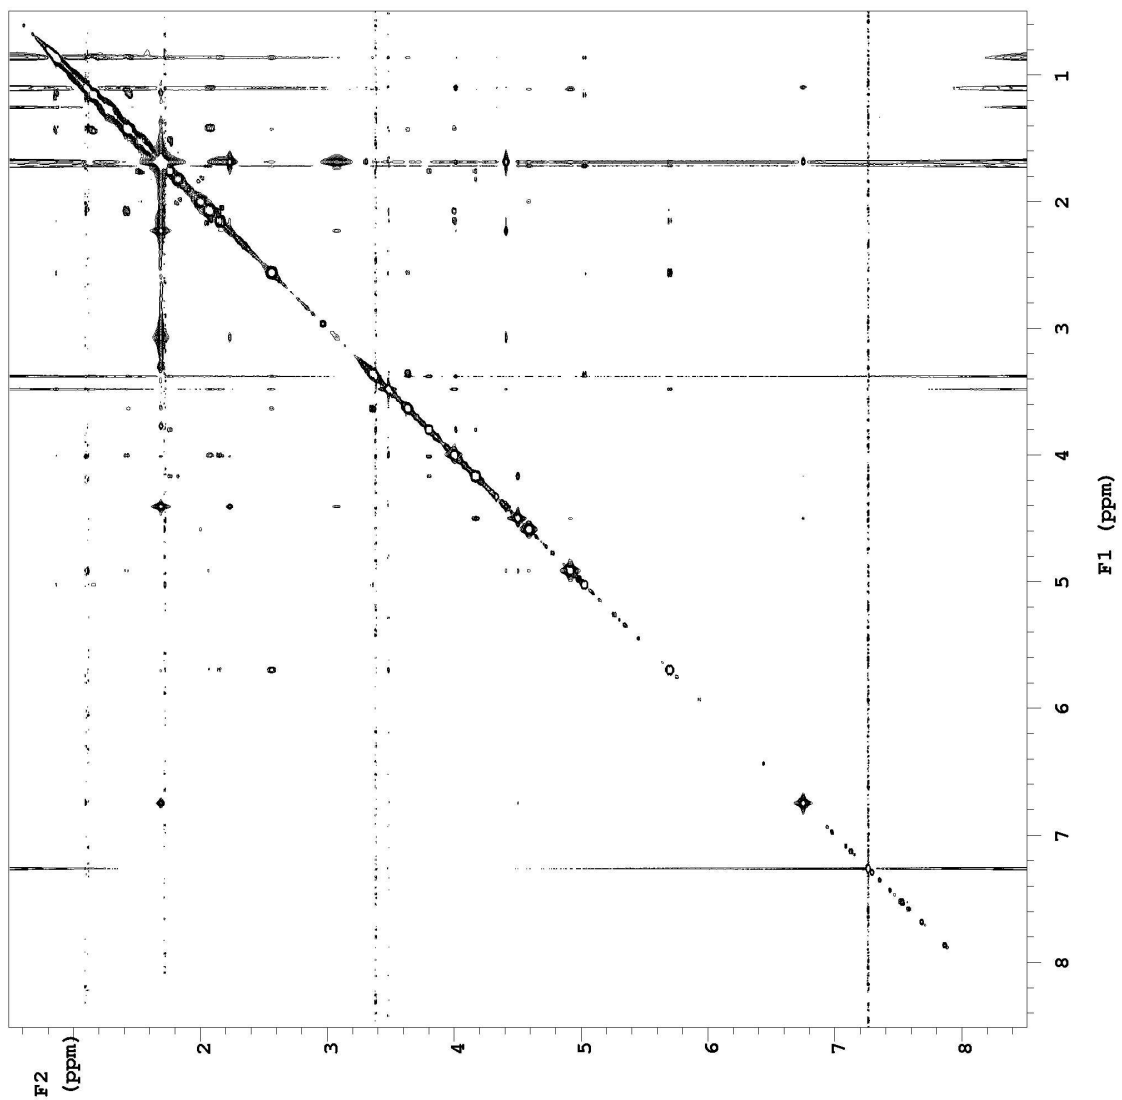

NOESY<sub>zq</sub> NMR spectrum of *natural* peloruside B (**2**) in CDCl<sub>3</sub> (600 MHz).
